# Supplementary material for: Towards an online-coupled chemistry-climate model: evaluation of trace gases and aerosols in COSMO-ART
Source: Copernicus journal article supplement (doi:10.5194/gmd-4-1077-2011), 2011-12-02
Supplement: Supplementary file 1 [file gmd-4-1077-2011-supplement.pdf]

# Supplement to 'Towards an online-coupled chemistry-climate model: evaluation of trace gases and aerosols in COSMO-ART'

Christoph Knote<sup>1,2</sup>, Dominik Brunner<sup>1,2</sup>, Heike Vogel<sup>3</sup>, James Allan<sup>4</sup>, Ari Asmi<sup>5</sup>, Mikko Äijälä<sup>5</sup>, Samara Carbone<sup>6</sup>, Hugo Denier van der Gon<sup>7</sup>, Jose L. Jimenez<sup>8</sup>, Astrid Kiendler-Scharr<sup>9</sup>, Claudia Mohr<sup>10</sup>, Laurent Poulain<sup>11</sup>, André S. H. Prévôt<sup>10</sup>, Erik Swietlicki<sup>12</sup>, and Bernhard Vogel<sup>3</sup>

<sup>1</sup> Laboratory for Air Pollution / Env. Technology, Empa Materials and Science, 8600 Duebendorf, Switzerland

<sup>2</sup> C<sub>2</sub>SM Center for Climate Systems Modeling, ETH, Zurich, Switzerland

<sup>3</sup> Institute for Meteorology and Climate Research, Karlsruhe Institute of Technology, Karlsruhe, Germany

<sup>4</sup> School of Earth Atmospheric, and Environmental Sciences, National Centre for Atmospheric Science, University of Manchester, Manchester, UK

<sup>5</sup> Department of Physics, University of Helsinki, Helsinki, Finland

<sup>6</sup> Air Quality Research, Finnish Meteorological Institute, Helsinki, Finland

<sup>7</sup> TNO Princetonlaan 6, 3584 CB Utrecht, The Netherlands

<sup>8</sup> CIRES and Dept. of Chemistry and Biochemistry, Univ. of Colorado, Boulder, CO, USA

<sup>9</sup> Institut IEK-8, Troposphäre, Forschungszentrum Jülich, Jülich, Germany

<sup>10</sup> Laboratory of Atmospheric Chemistry, Paul Scherrer Institute, Villigen, Switzerland

<sup>11</sup> Leibniz Institute for Tropospheric Research, Leipzig, Germany

<sup>12</sup> Division of Nuclear Physics, Department of Physics, Lund University, Lund, Sweden

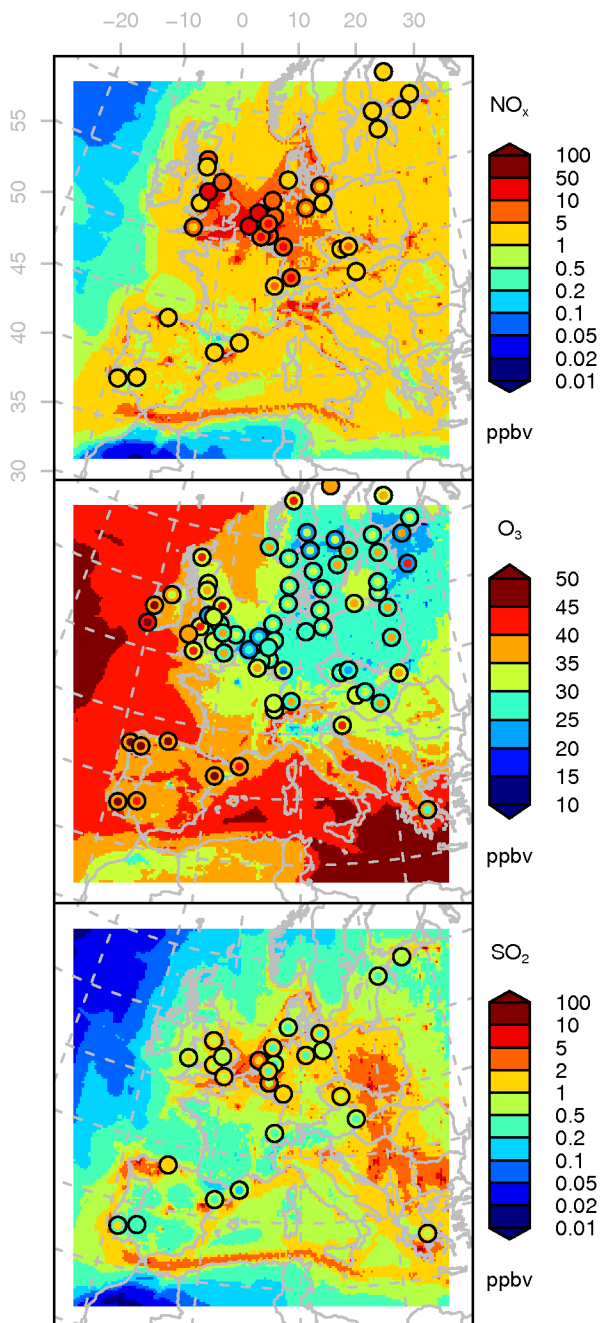

Figure 12: Overview of mean afternoon (hours 12 -18)  $\text{NO}_x$ ,  $\text{O}_3$  and  $\text{SO}_2$  concentrations like in Figure 4 but for the spring 2009 period.

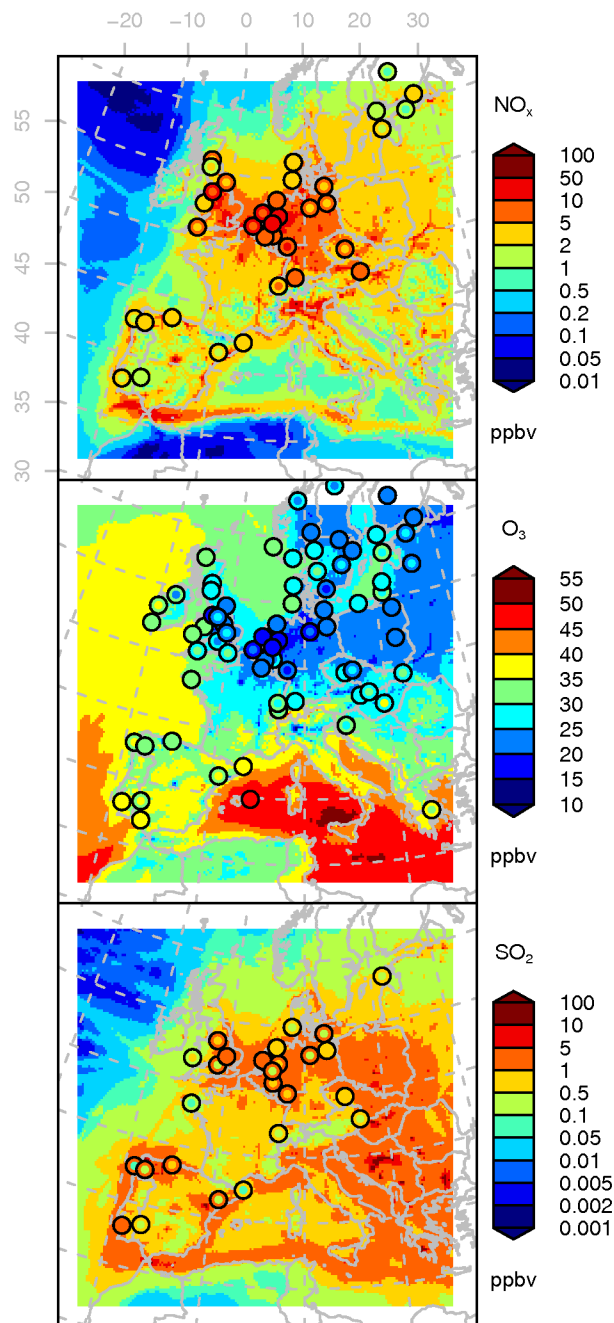

Figure 13: Overview of mean afternoon (hours 12 -18)  $\text{NO}_x$ ,  $\text{O}_3$  and  $\text{SO}_2$  concentrations like in Figure 4 but for the autumn 2008 period.

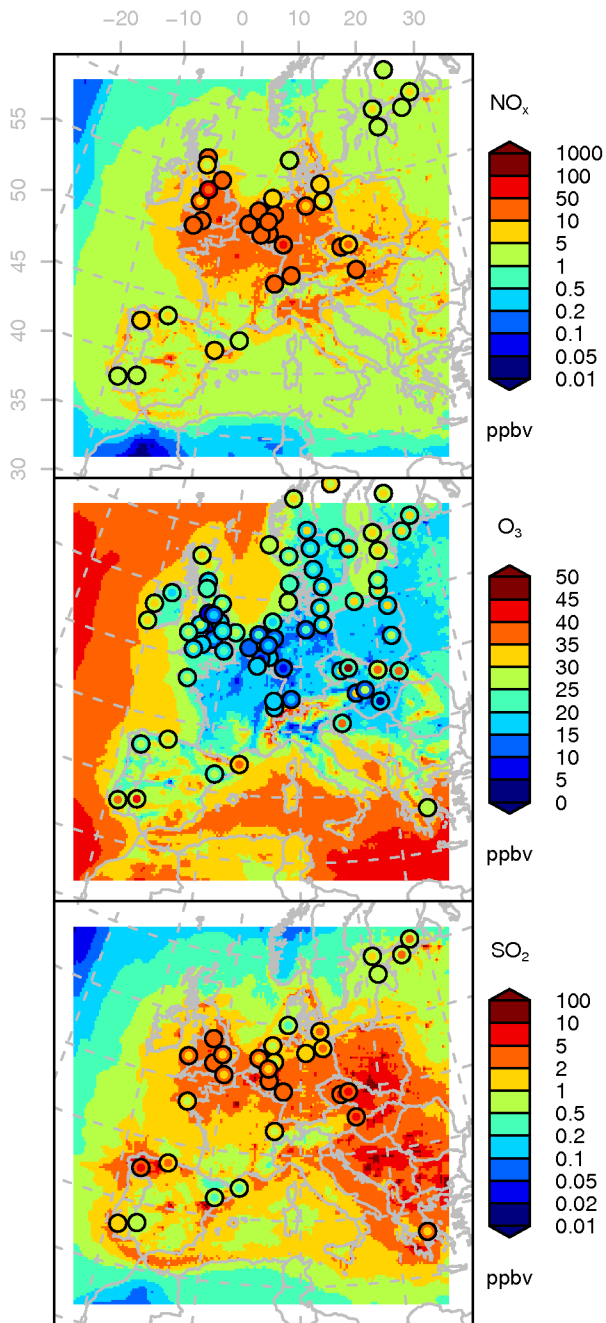

Figure 14: Overview of mean afternoon (hours 12 -18) NO<sub>x</sub>, O<sub>3</sub> and SO<sub>2</sub> concentrations like in Figure 4 but for the winter 2006 period.

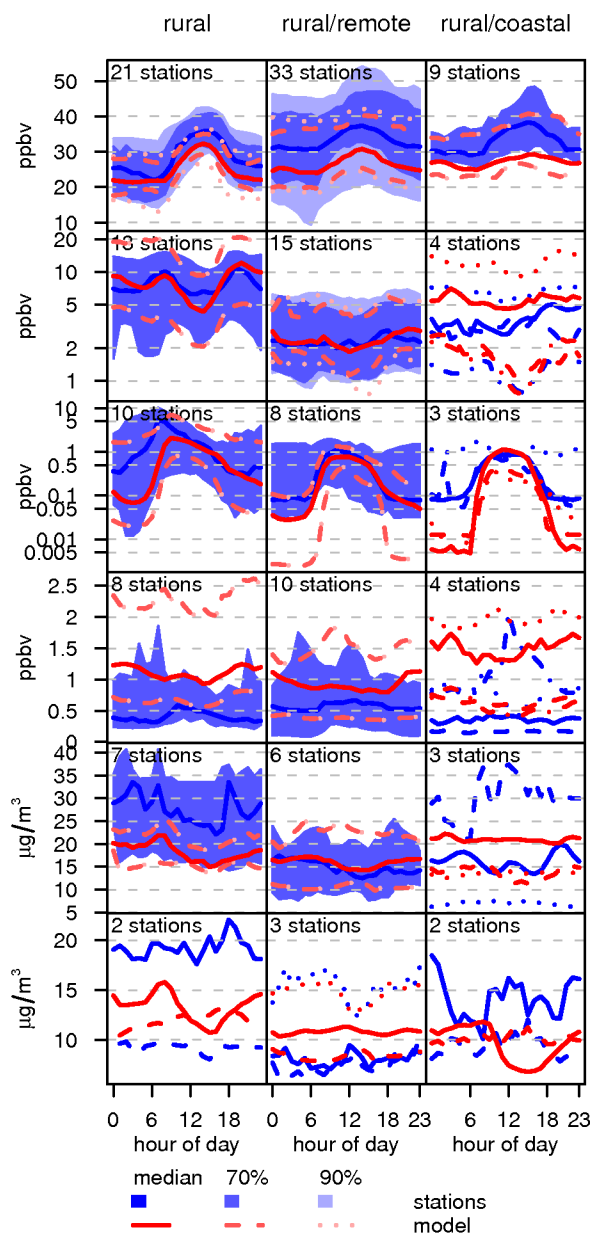

Figure 15: Statistics of mean diurnal cycles of several compounds for model and AIRBASE data. Like Figure 5 but for the spring 2009 period.

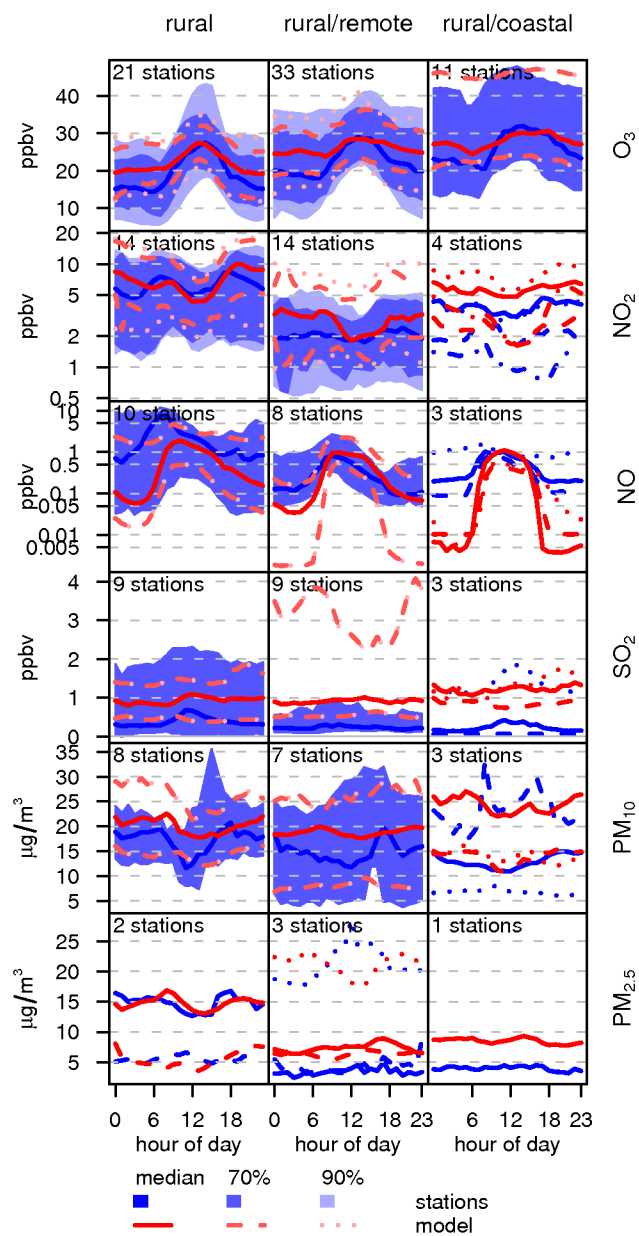

Figure 16: Statistics of mean diurnal cycles of several compounds for model and AIRBASE data. Like Figure 5 but for the autumn 2008 period.

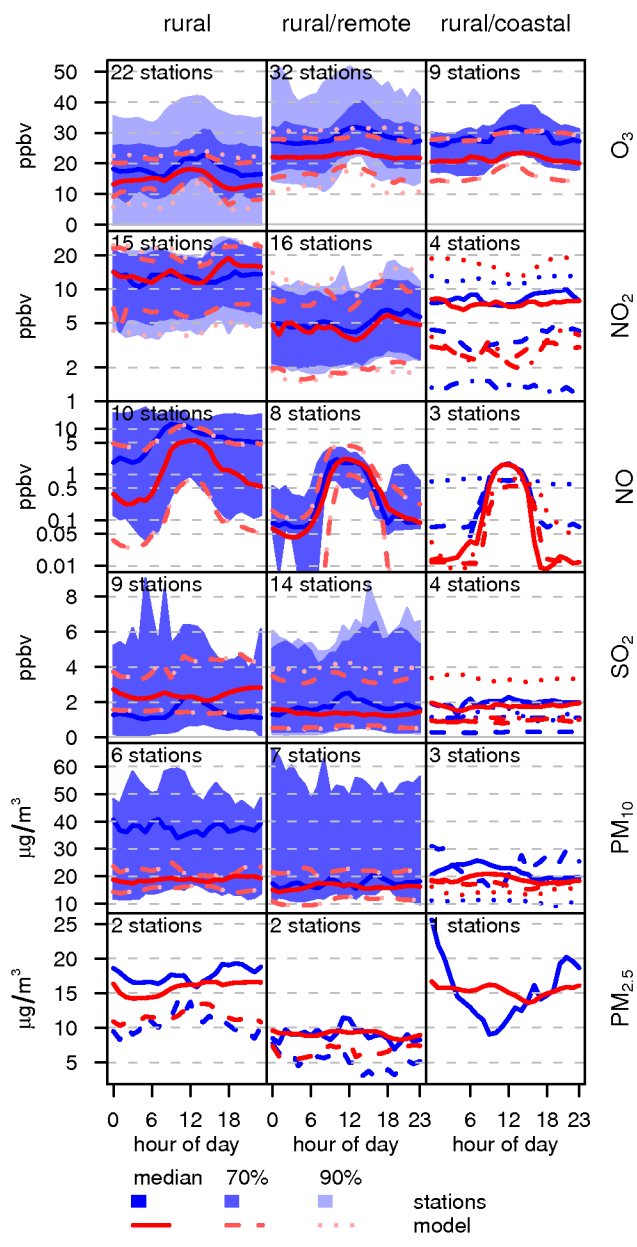

Figure 17: Statistics of mean diurnal cycles of several compounds for model and AIRBASE data. Like Figure 5 but for the winter 2006 period.

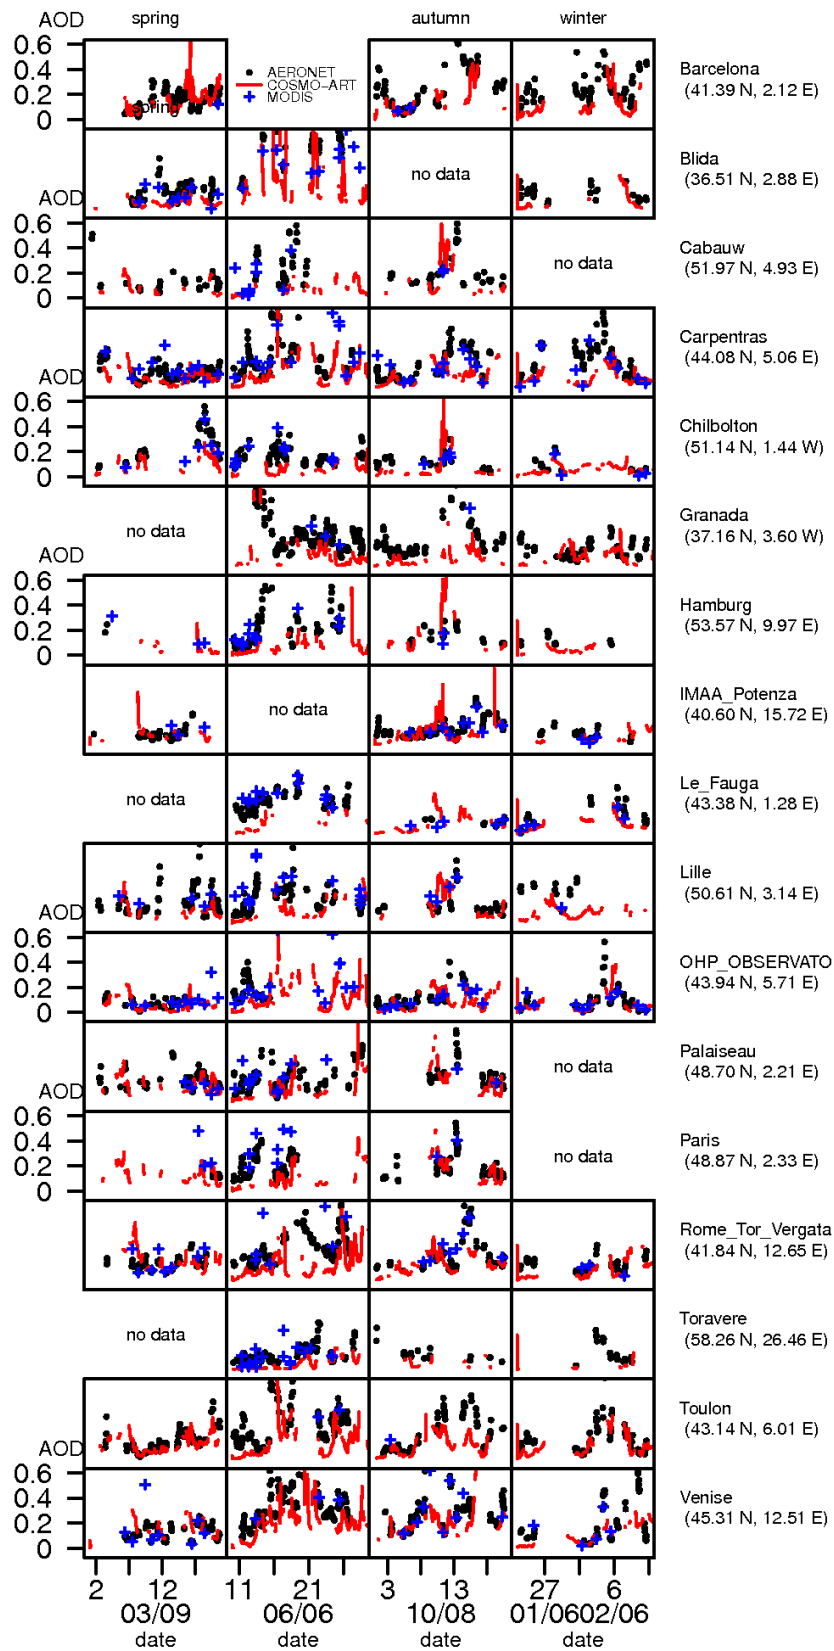

Figure 18: Timelines of aerosol optical depth (AOD) at several AERONET stations in Europe. Like Figure 8 but for the remaining stations.

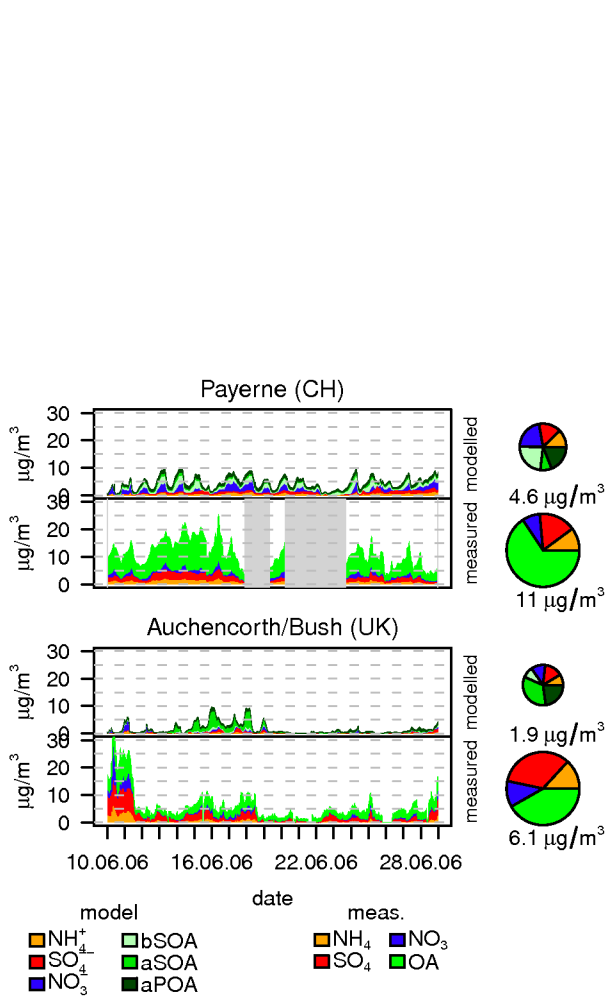

Figure 19: Timeline of aerosol chemical composition. Like Figures 9 and 10 a,b, but for the summer 2006 period.

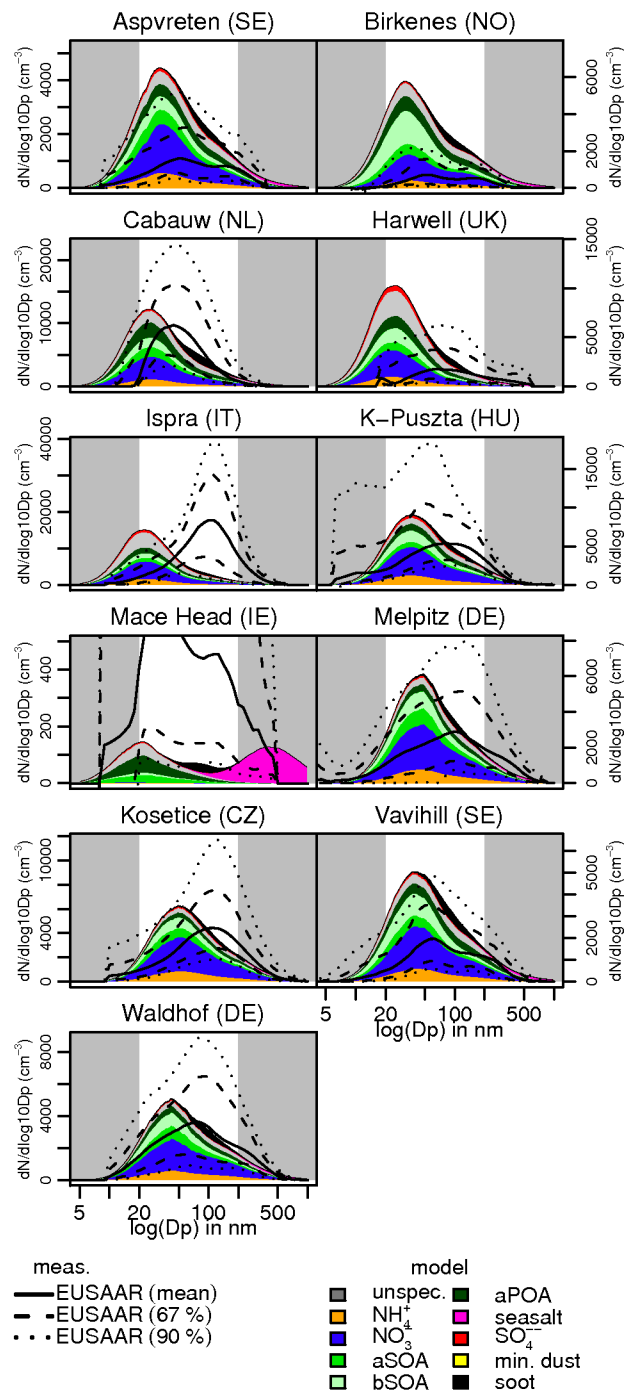

Figure 20: Comparison of modelled and measured aerosol size distributions at EUSAAR stations. Like Figure 11 but for the spring 2009 period.
